# Supplementary material
Source: publisher figshare collection journal article supplement (https://frontiersin.figshare.com/ndownloader/files/26740391)
Supplement: Supplementary file 1 [file 26740391]

## Sheet: Sheet1
Table S2 14C ages and 14C occupations from archaeological sites for the lower Yangtze region
Site name	Region	14C age (yr BP)	1σ	14C dates yr BP (occuptaions/averaged dates)	1σ	X2-Test: df	T	5 % Critical Value	Calibrated age range (cal. yr BP)				Median (cal. yr BP)	*Altitude (m)
									68.3% Probability		95.4% Probability
									from	to	from	to
Anxi	Taihu region	4210	85						4854	4586	4963	4450	4724	9
Bianjiashan	Taihu region	3520	70	3600	29	2	3.1	6	3967	3851	3983	3832	3905	10
Bianjiashan	Taihu region	3604	33
Bianjiashan	Taihu region	3745	110
Bianjiashan	Taihu region	3930	55	4037	12	11	10.3	19.7	4525	4444	4568	4425	4471	10
Bianjiashan	Taihu region	4005	40
Bianjiashan	Taihu region	4010	35
Bianjiashan	Taihu region	4010	35
Bianjiashan	Taihu region	4015	40
Bianjiashan	Taihu region	4030	40
Bianjiashan	Taihu region	4045	40
Bianjiashan	Taihu region	4070	40
Bianjiashan	Taihu region	4075	40
Bianjiashan	Taihu region	4075	35
Bianjiashan	Taihu region	4075	40
Bianjiashan	Taihu region	4095	70
Bianjiashan	Taihu region	4100	30	4162	4	40	26.4	54.9	4818	4647	4823	4622	4709	10
Bianjiashan	Taihu region	4125	20
Bianjiashan	Taihu region	4128	21
Bianjiashan	Taihu region	4130	40
Bianjiashan	Taihu region	4130	40
Bianjiashan	Taihu region	4130	55
Bianjiashan	Taihu region	4133	32
Bianjiashan	Taihu region	4135	40
Bianjiashan	Taihu region	4135	32
Bianjiashan	Taihu region	4140	40
Bianjiashan	Taihu region	4142	33
Bianjiashan	Taihu region	4145	35
Bianjiashan	Taihu region	4146	24
Bianjiashan	Taihu region	4149	25
Bianjiashan	Taihu region	4150	55
Bianjiashan	Taihu region	4150	30
Bianjiashan	Taihu region	4155	35
Bianjiashan	Taihu region	4157	24
Bianjiashan	Taihu region	4158	24
Bianjiashan	Taihu region	4159	37
Bianjiashan	Taihu region	4160	37
Bianjiashan	Taihu region	4160	40
Bianjiashan	Taihu region	4160	40
Bianjiashan	Taihu region	4161	25
Bianjiashan	Taihu region	4162	37
Bianjiashan	Taihu region	4164	21
Bianjiashan	Taihu region	4165	35
Bianjiashan	Taihu region	4168	25
Bianjiashan	Taihu region	4168	24
Bianjiashan	Taihu region	4174	32
Bianjiashan	Taihu region	4174	25
Bianjiashan	Taihu region	4178	18
Bianjiashan	Taihu region	4179	21
Bianjiashan	Taihu region	4180	24
Bianjiashan	Taihu region	4181	32
Bianjiashan	Taihu region	4185	25
Bianjiashan	Taihu region	4185	20
Bianjiashan	Taihu region	4188	24
Bianjiashan	Taihu region	4188	25
Bianjiashan	Taihu region	4188	21
Bianjiashan	Taihu region	4194	24
Bianjiashan	Taihu region	4200	40	4240	6	29	25	42.2	4841	4830	4848	4825	4835	10
Bianjiashan	Taihu region	4206	31
Bianjiashan	Taihu region	4211	32
Bianjiashan	Taihu region	4211	38
Bianjiashan	Taihu region	4211	23
Bianjiashan	Taihu region	4212	24
Bianjiashan	Taihu region	4214	25
Bianjiashan	Taihu region	4217	31
Bianjiashan	Taihu region	4218	38
Bianjiashan	Taihu region	4220	35
Bianjiashan	Taihu region	4220	35
Bianjiashan	Taihu region	4221	27
Bianjiashan	Taihu region	4222	48
Bianjiashan	Taihu region	4223	20
Bianjiashan	Taihu region	4235	55
Bianjiashan	Taihu region	4236	40
Bianjiashan	Taihu region	4238	20
Bianjiashan	Taihu region	4243	20
Bianjiashan	Taihu region	4245	40
Bianjiashan	Taihu region	4250	40
Bianjiashan	Taihu region	4250	25
Bianjiashan	Taihu region	4255	40
Bianjiashan	Taihu region	4258	21
Bianjiashan	Taihu region	4259	24
Bianjiashan	Taihu region	4265	35
Bianjiashan	Taihu region	4265	55
Bianjiashan	Taihu region	4275	40
Bianjiashan	Taihu region	4275	40
Bianjiashan	Taihu region	4284	25
Bianjiashan	Taihu region	4294	20
Bianjiashan	Taihu region	4301	39	4374	9	15	23.2	25	4960	4875	4970	4868	4920	10
Bianjiashan	Taihu region	4306	31
Bianjiashan	Taihu region	4318	40
Bianjiashan	Taihu region	4343	52
Bianjiashan	Taihu region	4354	57
Bianjiashan	Taihu region	4358	20
Bianjiashan	Taihu region	4364	40
Bianjiashan	Taihu region	4364	25
Bianjiashan	Taihu region	4370	34
Bianjiashan	Taihu region	4385	40
Bianjiashan	Taihu region	4407	32
Bianjiashan	Taihu region	4408	34
Bianjiashan	Taihu region	4410	37
Bianjiashan	Taihu region	4427	31
Bianjiashan	Taihu region	4430	47
Bianjiashan	Taihu region	4443	34
Caoxieshan	Taihu region	5210	105	5292	64	2	3.2	6	6184	5994	6269	5929	6081	8
Caoxieshan	Taihu region	5220	110
Caoxieshan	Taihu region	5460	115
Chuodun	Taihu region	4084	54						4798	4448	4817	4425	4599	9
Chuodun	Taihu region	4306	48						4959	4833	5039	4729	4877	9
Chuodun	Taihu region	5123	45						5930	5755	5989	5745	5852	9
Cuimuqiao	Taihu region	3830	95						4405	4096	4516	3934	4233	17
Dongshancun	Taihu region	5060	70	5126	15	6	2.3	12.6	5922	5769	5928	5760	5903	13
Dongshancun	Taihu region	5085	60
Dongshancun	Taihu region	5111	34
Dongshancun	Taihu region	5125	29
Dongshancun	Taihu region	5137	28
Dongshancun	Taihu region	5139	33
Dongshancun	Taihu region	5165	60
Dongshancun	Taihu region	5425	120						6310	6005	6443	5932	6203	13
Dongshancun	Taihu region	5885	130						6882	6505	7154	6398	6709	13
Dongyuan	Taihu region	4516	60	4563	43	1	1.2	3.8	5432	5059	5443	5048	5190	8
Dongyuan	Taihu region	4610	60
Fanshan	Taihu region	4305	35						4954	4835	4963	4831	4863	14
Fanshan	Taihu region	4400	30						5036	4878	5214	4862	4962	14
Fanshan	Taihu region	4500	25						5286	5053	5295	5047	5162	14
Fanshan	Taihu region	4910	25						5653	5595	5712	5588	5634	14
Fuquanshan	Taihu region	4600	80						5465	5058	5573	4984	5305	4
Fuquanshan	Taihu region	4810	80	4840	57	1	0.3	3.8	5649	5478	5716	5334	5559	4
Fuquanshan	Taihu region	4870	80
Ganggongling	Taihu region	4305	35						4954	4835	4963	4831	4863	156
Ganggongling	Taihu region	4420	40	4426	27	1	0	3.8	5213	4886	5271	4874	5011	156
Ganggongling	Taihu region	4430	35
Guangfulin	Taihu region	3555	25						3890	3779	3961	3724	3852	23
Guangfulin	Taihu region	3635	25	3650	18	1	0.7	3.8	4065	3922	4080	3897	3966	23
Guangfulin	Taihu region	3665	25
Guangfulin	Taihu region	3730	25						4146	3996	4152	3984	4079	23
Guangfulin	Taihu region	4110	40						4799	4530	4821	4450	4638	23
Guangfulin	Taihu region	4600	40						5445	5289	5465	5058	5323	23
Guanshan	Taihu region	4265	35						4861	4826	4955	4652	4841	9
Guoyuancun	Taihu region	3960	100						4569	4240	4813	4096	4414	23
Huishan	Taihu region	3630	75						4081	3842	4153	3718	3950	4
Jiangli	Taihu region	4445	30	4478	22	1	2.3	3.8	5277	5047	5287	4983	5180	7
Jiangli	Taihu region	4510	30
Jiangli	Taihu region	4700	30						5471	5327	5572	5321	5392	7
Jiangli	Taihu region	4810	30						5589	5482	5593	5477	5520	7
Jintanlianshan	Taihu region	3531	111						3975	3643	4145	3494	3816	25
Jintansanxingcun	Taihu region	4219	111						4869	4538	5211	4421	4738	6
Jintansanxingcun	Taihu region	5013	83						5893	5609	5912	5595	5755	6
Laohuling	Taihu region	4060	35						4612	4443	4796	4422	4542	156
Laohuling	Taihu region	4215	35	4265	21	1	3	3.8	4850	4835	4861	4826	4843	156
Laohuling	Taihu region	4290	25
Laohuling	Taihu region	4475	35						5280	5043	5293	4975	5158	156
Liangzhu	Taihu region	3815	27	3853	15	3	3	7.8	4349	4185	4403	4156	4269	7
Liangzhu	Taihu region	3860	25
Liangzhu	Taihu region	3875	31
Liangzhu	Taihu region	3880	40
Liangzhu	Taihu region	3910	32	3948	10	10	11.8	18.3	4425	4359	4510	4300	4415	7
Liangzhu	Taihu region	3910	30
Liangzhu	Taihu region	3920	28
Liangzhu	Taihu region	3920	27
Liangzhu	Taihu region	3935	26
Liangzhu	Taihu region	3950	35
Liangzhu	Taihu region	3960	55
Liangzhu	Taihu region	3965	28
Liangzhu	Taihu region	3970	36
Liangzhu	Taihu region	3990	35
Liangzhu	Taihu region	3995	23
Liangzhu	Taihu region	4000	36	4047	10	7	8.1	14.1	4529	4446	4573	4441	4472	7
Liangzhu	Taihu region	4010	28
Liangzhu	Taihu region	4020	22
Liangzhu	Taihu region	4060	23
Liangzhu	Taihu region	4065	25
Liangzhu	Taihu region	4070	32
Liangzhu	Taihu region	4070	35
Liangzhu	Taihu region	4075	24
Liangzhu	Taihu region	4100	31	4136	10	9	6.9	16.9	4805	4585	4814	4576	4681	7
Liangzhu	Taihu region	4100	50
Liangzhu	Taihu region	4110	40
Liangzhu	Taihu region	4114	23
Liangzhu	Taihu region	4115	40
Liangzhu	Taihu region	4137	32
Liangzhu	Taihu region	4145	27
Liangzhu	Taihu region	4158	26
Liangzhu	Taihu region	4165	40
Liangzhu	Taihu region	4169	23
Liangzhu	Taihu region	4189	20	4221	6	18	16.7	28.9	4838	4823	4842	4728	4829	7
Liangzhu	Taihu region	4198	18
Liangzhu	Taihu region	4199	20
Liangzhu	Taihu region	4201	23
Liangzhu	Taihu region	4208	31
Liangzhu	Taihu region	4213	18
Liangzhu	Taihu region	4217	20
Liangzhu	Taihu region	4220	40
Liangzhu	Taihu region	4222	21
Liangzhu	Taihu region	4226	19
Liangzhu	Taihu region	4230	40
Liangzhu	Taihu region	4233	26
Liangzhu	Taihu region	4239	25
Liangzhu	Taihu region	4244	43
Liangzhu	Taihu region	4245	40
Liangzhu	Taihu region	4253	20
Liangzhu	Taihu region	4258	34
Liangzhu	Taihu region	4270	40
Liangzhu	Taihu region	4285	35
Liangzhu	Taihu region	4372	26	4395	18	2	2.1	6	5025	4881	5041	4870	4940	7
Liangzhu	Taihu region	4390	40
Liangzhu	Taihu region	4429	30
Liyushan	Taihu region	4130	40						4811	4575	4823	4527	4673	9
Liyushan	Taihu region	4285	30	4295	22	1	0.2	3.8	4861	4842	4951	4831	4852	9
Liyushan	Taihu region	4305	30
Longnan	Taihu region	4160	125	4163	79	1	0	3.8	4828	4582	4858	4445	4687	9
Longnan	Taihu region	4165	100
Longnan	Taihu region	4460	80	4555	48	2	2.8	6	5319	5055	5443	5044	5178	9
Longnan	Taihu region	4550	90
Longnan	Taihu region	4650	80
Luojiajiao	Taihu region	6080	130	6169	80	1	0.7	3.8	7162	6958	7259	6854	7060	8
Luojiajiao	Taihu region	6220	100
Maoshan	Taihu region	4125	25						4800	4578	4817	4529	4667	10
Maoshan	Taihu region	4770	30						5579	5477	5587	5335	5525	10
Maoshan	Taihu region	4980	35						5740	5608	5883	5600	5695	10
Meirendi	Taihu region	3960	25						4513	4407	4520	4297	4429	7
Meirendi	Taihu region	4050	25	4093	11	7	5.1	14.1	4778	4529	4793	4523	4575	7
Meirendi	Taihu region	4085	25
Meirendi	Taihu region	4095	30
Meirendi	Taihu region	4095	35
Meirendi	Taihu region	4100	45
Meirendi	Taihu region	4110	30
Meirendi	Taihu region	4125	25
Meirendi	Taihu region	4140	200
Meirendi	Taihu region	4167	20	4173	10	4	0.2	9.5	4822	4651	4828	4625	4720	7
Meirendi	Taihu region	4171	22
Meirendi	Taihu region	4174	20
Meirendi	Taihu region	4175	30
Meirendi	Taihu region	4180	19
Meirendi	Taihu region	4218	20	4226	9	4	0.4	9.5	4840	4824	4845	4728	4830	7
Meirendi	Taihu region	4222	20
Meirendi	Taihu region	4228	19
Meirendi	Taihu region	4230	20
Meirendi	Taihu region	4234	20
Miaoqian	Taihu region	4137	54	4158	41	1	0.3	3.8	4822	4619	4833	4534	4699	7
Miaoqian	Taihu region	4184	61
Mifenglong	Taihu region	4340	35	4363	25	1	0.8	3.8	4960	4867	5029	4856	4921	156
Mifenglong	Taihu region	4385	35
Mojiaoshan	Taihu region	3960	30						4516	4360	4520	4296	4427	11
Mojiaoshan	Taihu region	4060	30	4067	18	2	0.3	6	4575	4451	4784	4444	4546	11
Mojiaoshan	Taihu region	4060	30
Mojiaoshan	Taihu region	4080	30
Mojiaoshan	Taihu region	4140	30	4171	17	1	1.6	3.8	4822	4649	4829	4620	4717	11
Mojiaoshan	Taihu region	4185	20
Mojiaoshan	Taihu region	4215	20	4247	12	4	5.5	9.5	4845	4830	4852	4825	4837	11
Mojiaoshan	Taihu region	4235	25
Mojiaoshan	Taihu region	4265	25
Mojiaoshan	Taihu region	4275	25
Mojiaoshan	Taihu region	4280	35
Mojiaoshan	Taihu region	4305	25	4352	11	7	12	14.1	4959	4861	4960	4860	4910	11
Mojiaoshan	Taihu region	4320	25
Mojiaoshan	Taihu region	4335	35
Mojiaoshan	Taihu region	4335	35
Mojiaoshan	Taihu region	4355	25
Mojiaoshan	Taihu region	4385	30
Mojiaoshan	Taihu region	4400	30
Mojiaoshan	Taihu region	4400	30
Mojiaoshan	Taihu region	5845	25						6729	6633	6740	6564	6664	11
Qiandixiang	Taihu region	4300	100	4422	73	1	3	3.8	5266	4874	5288	4860	5042	12
Qiandixiang	Taihu region	4550	105
Qianshanyang	Taihu region	3505	35	3548	17	4	2.7	9.5	3877	3779	3898	3726	3844	11
Qianshanyang	Taihu region	3545	35
Qianshanyang	Taihu region	3550	35
Qianshanyang	Taihu region	3580	35
Qianshanyang	Taihu region	3580	55
Qianshanyang	Taihu region	3630	40	3646	22	2	0.8	6	4061	3909	4082	3890	3959	11
Qianshanyang	Taihu region	3635	35
Qianshanyang	Taihu region	3675	40
Qianshanyang	Taihu region	3720	60	3770	14	7	1.8	14.1	4217	4093	4231	4086	4123	11
Qianshanyang	Taihu region	3750	40
Qianshanyang	Taihu region	3755	35
Qianshanyang	Taihu region	3770	35
Qianshanyang	Taihu region	3775	35
Qianshanyang	Taihu region	3780	40
Qianshanyang	Taihu region	3780	45
Qianshanyang	Taihu region	3795	35
Qianshanyang	Taihu region	3800	40	3849	12	10	12.4	18.3	4293	4185	4400	4155	4259	11
Qianshanyang	Taihu region	3800	40
Qianshanyang	Taihu region	3815	35
Qianshanyang	Taihu region	3820	35
Qianshanyang	Taihu region	3820	35
Qianshanyang	Taihu region	3840	40
Qianshanyang	Taihu region	3890	40
Qianshanyang	Taihu region	3895	40
Qianshanyang	Taihu region	3895	35
Qianshanyang	Taihu region	3905	75
Qianshanyang	Taihu region	3910	40
Qianshanyang	Taihu region	3960	50	4017	28	4	3.2	9.5	4521	4425	4569	4416	4477	11
Qianshanyang	Taihu region	4015	50
Qianshanyang	Taihu region	4020	85
Qianshanyang	Taihu region	4060	70
Qianshanyang	Taihu region	4120	85
Qianshanyang	Taihu region	4560	90	4564	67	1	0	3.8	5439	5053	5465	4979	5210	11
Qianshanyang	Taihu region	4570	100
Qingdun	Taihu region	4450	80	4585	24	4	6.1	9.5	5433	5295	5444	5075	5310	8
Qingdun	Taihu region	4550	85
Qingdun	Taihu region	4555	40
Qingdun	Taihu region	4620	35
Qingdun	Taihu region	4690	85
Qingdun	Taihu region	4800	75	4873	45	3	4.2	7.8	5657	5490	5721	5479	5604	8
Qingdun	Taihu region	4870	85
Qingdun	Taihu region	4890	80
Qingdun	Taihu region	5180	175
Qiucheng	Taihu region	5870	100						6830	6554	6940	6447	6687	8
Qiuwu	Taihu region	4285	40	4319	27	1	1.3	3.8	4955	4842	4960	4839	4868	156
Qiuwu	Taihu region	4345	35
Shiwu	Taihu region	4325	30	4336	23	1	0.3	3.8	4959	4851	4962	4848	4892	156
Shiwu	Taihu region	4350	35
Shizishan	Taihu region	4320	30	4333	22	1	0.3	3.8	4957	4850	4961	4847	4882	9
Shizishan	Taihu region	4345	30
Sidun	Taihu region	4150	200						4961	4410	5291	4151	4674	8
Siqian	Taihu region	4510	70	4630	45	2	5.3	6	5456	5309	5476	5090	5397	6
Siqian	Taihu region	4680	70
Siqian	Taihu region	4765	100
Songze	Taihu region	4500	105						5310	4979	5457	4858	5143	6
Songze	Taihu region	5000	75	5153	40	5	8.5	11.1	5989	5769	5997	5753	5915	6
Songze	Taihu region	5080	200
Songze	Taihu region	5150	75
Songze	Taihu region	5190	105
Songze	Taihu region	5240	180
Songze	Taihu region	5330	90
Tangshan	Taihu region	4305	30	4313	23	1	0.2	3.8	4872	4843	4960	4836	4861	8
Tangshan	Taihu region	4325	35
Tinglin	Taihu region	3540	150	3677	81	1	1.1	3.8	4145	3896	4284	3728	4016	9
Tinglin	Taihu region	3730	95
Tinglin	Taihu region	4200	70						4844	4621	4866	4525	4718	9
Wutongnong	Taihu region	4375	35						4969	4869	5043	4856	4934	9
Xudun	Taihu region	4560	240	4887	51	3	2.1	7.8	5706	5582	5739	5479	5628	11
Xudun	Taihu region	4860	120
Xudun	Taihu region	4880	120
Xudun	Taihu region	4920	65
Xudun	Taihu region	5150	110	5255	82	2	2	6	6178	5930	6277	5769	6051	11
Xudun	Taihu region	5330	200
Xudun	Taihu region	5400	150
Yangjia	Taihu region	5340	30	5317	25	1	1.9	3.8	6183	6005	6192	5999	6083	10
Yangjia	Taihu region	5265	45
Zhanglingshan	Taihu region	5010	230						6103	5477	6304	5142	5767	7
Zhongjiagang	Taihu region	3740	25						4149	4004	4224	3985	4096	11
Zhongjiagang	Taihu region	3865	25	3888	18	1	1.6	3.8	4404	4292	4410	4246	4335	11
Zhongjiagang	Taihu region	3910	25
Zhongjiagang	Taihu region	3980	25	4050	8	13	15	22.4	4566	4447	4572	4443	4474	11
Zhongjiagang	Taihu region	4010	55
Zhongjiagang	Taihu region	4030	25
Zhongjiagang	Taihu region	4035	30
Zhongjiagang	Taihu region	4040	25
Zhongjiagang	Taihu region	4045	25
Zhongjiagang	Taihu region	4045	25
Zhongjiagang	Taihu region	4055	25
Zhongjiagang	Taihu region	4055	30
Zhongjiagang	Taihu region	4075	25
Zhongjiagang	Taihu region	4075	25
Zhongjiagang	Taihu region	4080	35
Zhongjiagang	Taihu region	4080	25
Zhongjiagang	Taihu region	4085	30
Zhongjiagang	Taihu region	4105	25	4158	6	21	31.3	32.7	4817	4645	4823	4618	4704	11
Zhongjiagang	Taihu region	4106	25
Zhongjiagang	Taihu region	4110	22
Zhongjiagang	Taihu region	4121	28
Zhongjiagang	Taihu region	4132	24
Zhongjiagang	Taihu region	4139	25
Zhongjiagang	Taihu region	4143	26
Zhongjiagang	Taihu region	4147	28
Zhongjiagang	Taihu region	4148	25
Zhongjiagang	Taihu region	4153	28
Zhongjiagang	Taihu region	4158	28
Zhongjiagang	Taihu region	4168	26
Zhongjiagang	Taihu region	4175	25
Zhongjiagang	Taihu region	4176	28
Zhongjiagang	Taihu region	4180	30
Zhongjiagang	Taihu region	4181	24
Zhongjiagang	Taihu region	4189	27
Zhongjiagang	Taihu region	4191	27
Zhongjiagang	Taihu region	4191	26
Zhongjiagang	Taihu region	4195	25
Zhongjiagang	Taihu region	4196	27
Zhongjiagang	Taihu region	4199	26
Zhongjiagang	Taihu region	4201	26	4225	9	9	9.5	16.9	4839	4823	4845	4727	4830	11
Zhongjiagang	Taihu region	4202	25
Zhongjiagang	Taihu region	4205	35
Zhongjiagang	Taihu region	4208	27
Zhongjiagang	Taihu region	4209	24
Zhongjiagang	Taihu region	4225	25
Zhongjiagang	Taihu region	4228	30
Zhongjiagang	Taihu region	4235	30
Zhongjiagang	Taihu region	4248	27
Zhongjiagang	Taihu region	4285	25
Zhongjiagang	Taihu region	4305	25	4346	11	5	9.6	11.1	4957	4858	4960	4856	4898	11
Zhongjiagang	Taihu region	4325	25
Zhongjiagang	Taihu region	4335	25
Zhongjiagang	Taihu region	4345	25
Zhongjiagang	Taihu region	4360	25
Zhongjiagang	Taihu region	4408	26
Zhongjiagang	Taihu region	6440	35						7421	7325	7425	7280	7363	11
Zhoujiafan	Taihu region	4110	30						4797	4532	4816	4522	4632	156
Zhoujiafan	Taihu region	4200	30						4835	4652	4844	4620	4734	156
Zhoujiafan	Taihu region	4270	35	4290	25	1	0.7	3.8	4860	4840	4952	4828	4851	156
Zhoujiafan	Taihu region	4310	35
Zhumucun	Taihu region	3885	25						4404	4258	4413	4239	4328	8
Zhumucun	Taihu region	4105	20						4792	4531	4805	4524	4611	8
Zhumucun	Taihu region	4170	20						4823	4647	4830	4617	4715	8
Zhumucun	Taihu region	4305	25						4868	4841	4959	4832	4857	8
Hehuashan	Jinqu Basin	6830	30						7684	7618	7719	7588	7657	49
Hehuashan	Jinqu Basin	7810	40	7839	30	1	1.2	3.8	8642	8555	8722	8542	8615	49
Hehuashan	Jinqu Basin	7875	45
Hehuashan	Jinqu Basin	8030	30	8056	19	2	1.7	6	9015	8985	9023	8783	8997	49
Hehuashan	Jinqu Basin	8050	40
Hehuashan	Jinqu Basin	8085	30
Hehuashan	Jinqu Basin	8170	40						9197	9020	9272	9010	9107	49
Hehuashan	Jinqu Basin	9180	40						10379	10249	10491	10241	10336	49
Huxi	Jinqu Basin	7570	50	7631	17	4	4.9	9.5	8420	8395	8449	8381	8409	100
Huxi	Jinqu Basin	7605	30
Huxi	Jinqu Basin	7630	30
Huxi	Jinqu Basin	7660	40
Huxi	Jinqu Basin	7690	40
Huxi	Jinqu Basin	7730	25	7749	14	4	3.2	9.5	8586	8464	8590	8454	8526	100
Huxi	Jinqu Basin	7730	30
Huxi	Jinqu Basin	7740	30
Huxi	Jinqu Basin	7780	30
Huxi	Jinqu Basin	7790	40
Huxi	Jinqu Basin	7815	30	7838	18	3	4	7.8	8636	8592	8686	8548	8613	100
Huxi	Jinqu Basin	7820	30
Huxi	Jinqu Basin	7850	40
Huxi	Jinqu Basin	7915	45
Miaoshan	Jinqu Basin	8140	30	8170	22	1	2	3.8	9128	9025	9264	9016	9094	87
Miaoshan	Jinqu Basin	8200	30
Qiaotou	Jinqu Basin	7650	30						8453	8393	8520	8382	8429	88
Qiaotou	Jinqu Basin	7880	30						8720	8598	8972	8590	8675	88
Qiaotou	Jinqu Basin	7970	60	8025	22	4	3.9	9.5	9003	8785	9010	8776	8891	88
Qiaotou	Jinqu Basin	7985	50
Qiaotou	Jinqu Basin	8010	40
Qiaotou	Jinqu Basin	8045	50
Qiaotou	Jinqu Basin	8090	45
Shangshan	Jinqu Basin	6670	40						7581	7505	7610	7433	7534	56
Shangshan	Jinqu Basin	6895	40	6908	29	1	0.2	3.8	7776	7685	7827	7673	7731	56
Shangshan	Jinqu Basin	6920	40
Shangshan	Jinqu Basin	7335	40						8182	8039	8286	8022	8112	56
Shangshan	Jinqu Basin	7476	45						8361	8209	8373	8190	8285	56
Shangshan	Jinqu Basin	7830	40						8641	8548	8770	8476	8607	56
Shangshan	Jinqu Basin	7970	40	7979	38	1	0.5	3.8	8986	8775	8995	8650	8853	56
Shangshan	Jinqu Basin	8050	110
Shangshan	Jinqu Basin	8180	35						9199	9024	9272	9015	9115	56
Shangshan	Jinqu Basin	8620	160	8702	91	1	0.4	3.8	9885	9544	10122	9531	9707	56
Shangshan	Jinqu Basin	8740	110
Shangshan	Jinqu Basin	8800	35	8824	27	1	1.1	3.8	10112	9767	10122	9705	9861	56
Shangshan	Jinqu Basin	8855	40
Shangshan	Jinqu Basin	9365	35						10653	10512	10693	10445	10582	56
Shangshan	Jinqu Basin	9513	45	9568	30	1	2.6	3.8	11071	10772	11091	10738	10930	56
Shangshan	Jinqu Basin	9610	40
Cihu	Ningshao Plain	4640	80	4645	59	1	0	3.8	5465	5312	5578	5075	5395	13
Cihu	Ningshao Plain	4650	85
Cihu	Ningshao Plain	4980	85						5880	5600	5909	5585	5722	13
Fujiashan	Ningshao Plain	5640	40	5634	25	1	0	3.8	6449	6350	6487	6317	6413	5
Fujiashan	Ningshao Plain	5630	30
Fujiashan	Ningshao Plain	5895	40	5902	24	2	0.2	6	6742	6674	6785	6665	6714	5
Fujiashan	Ningshao Plain	5895	40
Fujiashan	Ningshao Plain	5915	40
Hemudu	Ningshao Plain	4570	40	4580	37	1	0.4	3.8	5440	5083	5449	5052	5298	47
Hemudu	Ningshao Plain	4630	90
Hemudu	Ningshao Plain	4910	100	4986	71	1	1.1	3.8	5863	5603	5895	5597	5723	47
Hemudu	Ningshao Plain	5060	100
Hemudu	Ningshao Plain	5120	90	5214	29	5	2.4	11.1	5994	5930	6163	5910	5967	47
Hemudu	Ningshao Plain	5160	90
Hemudu	Ningshao Plain	5170	100
Hemudu	Ningshao Plain	5210	90
Hemudu	Ningshao Plain	5220	95
Hemudu	Ningshao Plain	5250	40
Hemudu	Ningshao Plain	5400	80	5433	47	2	0.3	6	6290	6200	6309	6014	6234	47
Hemudu	Ningshao Plain	5450	80
Hemudu	Ningshao Plain	5450	80
Hemudu	Ningshao Plain	5740	90	5839	26	7	2.7	14.1	6728	6572	6739	6561	6657	47
Hemudu	Ningshao Plain	5770	85
Hemudu	Ningshao Plain	5810	100
Hemudu	Ningshao Plain	5850	35
Hemudu	Ningshao Plain	5870	100
Hemudu	Ningshao Plain	5880	100
Hemudu	Ningshao Plain	5890	100
Hemudu	Ningshao Plain	5890	120
Hemudu	Ningshao Plain	5910	100	6051	24	7	2.8	14.1	6946	6856	6982	6796	6902	47
Hemudu	Ningshao Plain	6020	85
Hemudu	Ningshao Plain	6020	85
Hemudu	Ningshao Plain	6020	100
Hemudu	Ningshao Plain	6060	100
Hemudu	Ningshao Plain	6070	30
Hemudu	Ningshao Plain	6080	200
Hemudu	Ningshao Plain	6080	130
Hemudu	Ningshao Plain	6130	100	6191	21	3	0.6	7.8	7120	7023	7164	7000	7076	47
Hemudu	Ningshao Plain	6130	170
Hemudu	Ningshao Plain	6190	30
Hemudu	Ningshao Plain	6200	30
Hupingshan	Ningshao Plain	3863	120						4424	4090	4784	3908	4276	9
Kuahuqiao	Ningshao Plain	6180	90						7235	6954	7271	6800	7069	46
Kuahuqiao	Ningshao Plain	6375	120	6423	73	1	0.2	3.8	7422	7281	7474	7167	7342	46
Kuahuqiao	Ningshao Plain	6450	90
Kuahuqiao	Ningshao Plain	6500	176	6534	35	3	1.1	7.8	7486	7368	7560	7334	7453	46
Kuahuqiao	Ningshao Plain	6515	40
Kuahuqiao	Ningshao Plain	6585	90
Kuahuqiao	Ningshao Plain	6615	110
Kuahuqiao	Ningshao Plain	6715	40	6766	18	5	3.1	11.1	7657	7584	7664	7579	7616	46
Kuahuqiao	Ningshao Plain	6752	33
Kuahuqiao	Ningshao Plain	6783	32
Kuahuqiao	Ningshao Plain	6795	35
Kuahuqiao	Ningshao Plain	6800	170
Kuahuqiao	Ningshao Plain	6870	210
Kuahuqiao	Ningshao Plain	6925	45	6975	29	5	2.9	11.1	7911	7750	7924	7706	7806	46
Kuahuqiao	Ningshao Plain	6970	100
Kuahuqiao	Ningshao Plain	6991	50
Kuahuqiao	Ningshao Plain	7055	90
Kuahuqiao	Ningshao Plain	7070	155
Kuahuqiao	Ningshao Plain	7076	155
Kuahuqiao	Ningshao Plain	7370	45	7378	45	1	0.9	3.8	8317	8045	8327	8035	8192	46
Kuahuqiao	Ningshao Plain	7595	242
Loujiaqiao	Ningshao Plain	5530	70						6399	6280	6485	6196	6333	11
Loujiaqiao	Ningshao Plain	5770	80						6665	6456	6779	6396	6569	11
Lujiaqiao	Ningshao Plain	5700	30						6531	6409	6602	6401	6477	4
Lujiaqiao	Ningshao Plain	5610	30						6435	6317	6480	6305	6369	4
Lujiaqiao	Ningshao Plain	5070	30						5896	5753	5906	5741	5816	4
Mingshanhou	Ningshao Plain	4786	226						5889	5140	5993	4871	5496	18
Tianluoshan	Ningshao Plain	3760	40	3832	18	4	6.1	9.5	4286	4155	4351	4150	4214	17
Tianluoshan	Ningshao Plain	3810	70
Tianluoshan	Ningshao Plain	3830	30
Tianluoshan	Ningshao Plain	3840	50
Tianluoshan	Ningshao Plain	3890	35
Tianluoshan	Ningshao Plain	3970	30	3986	24	2	0.7	6	4512	4419	4521	4412	4475	17
Tianluoshan	Ningshao Plain	4000	70
Tianluoshan	Ningshao Plain	4015	45
Tianluoshan	Ningshao Plain	4195	70	4237	35	1	0.5	3.8	4854	4724	4864	4645	4815	17
Tianluoshan	Ningshao Plain	4250	40
Tianluoshan	Ningshao Plain	4385	40	4457	18	4	4.3	9.5	5266	4982	5280	4973	5180	17
Tianluoshan	Ningshao Plain	4460	35
Tianluoshan	Ningshao Plain	4470	45
Tianluoshan	Ningshao Plain	4475	35
Tianluoshan	Ningshao Plain	4490	40
Tianluoshan	Ningshao Plain	4585	35	4618	27	1	2	3.8	5442	5310	5459	5298	5413	17
Tianluoshan	Ningshao Plain	4660	40
Tianluoshan	Ningshao Plain	4705	40	4772	22	2	5.6	6	5579	5478	5583	5474	5527	17
Tianluoshan	Ningshao Plain	4765	35
Tianluoshan	Ningshao Plain	4830	35
Tianluoshan	Ningshao Plain	4965	35	5009	25	2	3.4	6	5855	5661	5892	5608	5736	17
Tianluoshan	Ningshao Plain	5040	40
Tianluoshan	Ningshao Plain	5081	66
Tianluoshan	Ningshao Plain	5300	40						179	6000	6258	5941	6083	17
Tianluoshan	Ningshao Plain	5430	40	5446	30	1	0.3	3.8	6290	6210	6299	6198	6237	17
Tianluoshan	Ningshao Plain	5465	45
Tianluoshan	Ningshao Plain	5520	40	5560	24	2	1.5	6	6392	6305	6396	6300	6346	17
Tianluoshan	Ningshao Plain	5580	40
Tianluoshan	Ningshao Plain	5580	40
Tianluoshan	Ningshao Plain	5725	40	5763	26	2	1.5	6	6623	6500	6649	6490	6563	17
Tianluoshan	Ningshao Plain	5785	60
Tianluoshan	Ningshao Plain	5790	40
Tianluoshan	Ningshao Plain	5840	40	5872	25	1	1	3.8	6733	6665	6776	6636	6699	17
Tianluoshan	Ningshao Plain	5890	30
Tianluoshan	Ningshao Plain	5985	40	6030	22	3	6.4	7.8	6933	6800	6945	6794	6872	17
Tianluoshan	Ningshao Plain	5990	40
Tianluoshan	Ningshao Plain	6045	45
Tianluoshan	Ningshao Plain	6120	45
Tianluoshan	Ningshao Plain	6362	117						7422	7166	7503	6991	7275	17
Tianluoshan	Ningshao Plain	6711	90						7666	7507	7715	7426	7576	17
Tianluoshan	Ningshao Plain	6949	73						7842	7689	7937	7662	7782	17
Wuguishan	Ningshao Plain	4110	30						4797	4532	4816	4522	4632	14
Wuguishan	Ningshao Plain	5080	30						5901	5754	5909	5745	5813	14
Xiangjiashan	Ningshao Plain	5303	89	5334	65	1	0.3	3.8	6260	6003	6280	5944	6116	6
Xiangjiashan	Ningshao Plain	5369	95
Xiaodongmen	Ningshao Plain	4573	92	4578	66	1	0	3.8	5445	5054	5470	4990	5255	32
Xiaodongmen	Ningshao Plain	4583	92
Xiasun	Ningshao Plain	6886	65	6908	38	1	0.2	3.8	7780	7684	7836	7668	7735	7
Xiasun	Ningshao Plain	6919	46
Xiawangdu	Ningshao Plain	4420	30	4448	17	1	1.2	3.8	5260	4977	5277	4968	5057	7
Xiawangdu	Ningshao Plain	4460	20
Xiawangdu	Ningshao Plain	4570	30						5431	5086	5442	5053	5290	7
Xiawangdu	Ningshao Plain	4650	20						5445	5320	5463	5315	5410	7
Xiawangdu	Ningshao Plain	4760	20						5575	5477	5583	5467	5532	7
Xiawangdu	Ningshao Plain	4850	30						5601	5488	5654	5479	5586	7
Yushan	Ningshao Plain	4170	30						4825	4644	4832	4581	4712	14
Yushan	Ningshao Plain	4300	25						4865	4841	4959	4830	4855	14
Yushan	Ningshao Plain	4525	25						5303	5058	5310	5051	5154	14
Yushan	Ningshao Plain	5210	30	5243	18	2	2.7	6	6103	5938	6169	5930	5975	14
Yushan	Ningshao Plain	5240	30
Yushan	Ningshao Plain	5280	30
Yushan	Ningshao Plain	5495	25						6308	6279	6391	6211	6294	14
Yushan	Ningshao Plain	5640	30	5655	20	1	0.4	3.8	6480	6401	6493	6357	6433	14
Yushan	Ningshao Plain	5665	25
Yushan	Ningshao Plain	5860	25						6732	6655	6745	6568	6687	14
Yushan	Ningshao Plain	6030	30						6937	6799	6956	6754	6872	14
* Altitute was extracted from 30m Global Digital Elevation Model (GDEM) Version 2.
